# Supplementary material for: Assessment of the impact of cataract surgery on subjective quality of vision across different intraocular lens type using the portuguese-validated QoV questionnaire
Source: Int Ophthalmol. 2026 Jul 20;46(1):301. doi: 10.1007/s10792-026-04172-x (PMC13384983; doi:10.1007/s10792-026-04172-x)
Supplement: Supplementary file 1 — Supplementary file1 (XLSX 49 KB) [file 10792_2026_4172_MOESM1_ESM.xlsx]

## Sheet: Planilha3
ID Patient	gender	age	phakic (y/n)	Q01	Q02	Q03	Q04	Q05	Q06	Q07	Q08	Q09	Q10	Q11	Q12	Q13	Q14	Q15	Q16	Q17	Q18	Q19	Q20	Q21	Q22	Q23	Q24	Q25	Q26	Q27	Q28	Q29	Q30	AVSC OD pré	AVSC OE pré	AVSC OD pós	AVSC OE pós	Frequency measure	Severity Measure	Bothersomeness measure
3	1	63	1	2	3	4	1	1	1	1	1	1	4	4	4	2	1	1	1	1	1	1	1	1	1	1	1	1	1	1	1	1	1	MM	0.9	0	0	-1.39	-1.38	-0.99
4	2	67	1	1	1	1	2	2	2	2	2	2	4	4	4	2	3	2	1	1	1	1	1	1	1	1	1	1	1	1	1	1	1	1.3	1.3	0.1	0.4	-1.2	-1.06	-0.99
5	1	55	1	1	1	1	2	3	2	2	2	2	1	1	1	1	1	1	1	1	1	1	1	1	2	1	1	1	1	1	2	3	3	0.1	0.3	0.2	0.3	-1.61	-1.38	-1.31
6	1	69	2	3	4	4	2	2	1	3	3	3	4	2	2	3	3	4	1	1	1	2	2	2	3	3	4	3	3	3	1	1	1	0	0	0	0	-0.04	-0.22	-0.07
7	2	61	1	1	1	1	1	1	1	2	2	2	1	2	2	4	4	4	1	1	1	1	1	1	1	1	1	1	1	1	3	3	3					-1.2	-1.06	-0.86
8	2	61	1	2	4	4	2	4	4	2	4	4	2	4	4	2	4	4	2	3	3	2	4	3	2	3	2	4	4	4	2	3	2	0.4	0.4	0.3	0.3	-0.38	1.98	1.01
9	1	60	1	1	1	1	2	3	2	3	2	4	2	3	3	2	3	4	2	3	3	1	1	1	4	4	4	4	4	4	1	1	1					-0.38	-0.1	0.13
10	2	72	1	2	2	1	1	1	1	1	1	1	3	2	2	1	1	1	1	1	1	1	1	1	4	4	4	1	1	1	4	3	3	1	0.4	0.3	0.3	-0.75	-1.06	-0.99
11	1	63	2	1	1	1	1	1	1	1	1	1	3	2	2	1	1	1	1	1	1	1	1	1	4	4	4	1	1	1	1	1	1	0.5	0.4	0.1	0	-1.39	-1.57	-1.31
12	2	75	2	4	3	3	3	3	3	3	4	3	4	4	4	4	4	4	1	1	1	1	1	1	4	4	4	1	1	1	3	3	3	0.7	0.4	0	0	0.32	0.26	0.13
13	2	59	1	1	1	1	1	1	1	1	1	1	2	4	4	4	4	4	3	3	3	1	1	1	1	1	1	4	4	4	4	4	4	0.6	0.6	0.1	0.1	-0.38	-0.22	-0.16
14	2	74	2	4	4	4	2	2	3	1	1	1	4	4	4	1	1	1	1	1	1	1	1	1	1	1	1	3	3	4	1	1	1	0.6	MM	0	0.1	-0.75	-0.8	-0.44
15	1	70	2	2	3	2	1	1	1	1	1	1	1	1	1	3	3	4	4	4	4	1	1	1	1	1	1	4	4	4	1	1	1					-0.75	-0.68	-0.54
18	2	73	2	1	1	1	1	1	1	2	2	2	2	2	2	2	2	2	2	2	2	2	2	2	2	2	2	2	3	4	2	3	3	0.3	0.1	0	0.1	-0.89	-0.68	-0.44
19	2	68	1	3	3	3	2	2	3	3	3	3	4	4	4	4	4	4	1	1	1	1	1	1	4	4	4	4	4	4	1	1	1	CD	1.3	0.6	0.1	0.2	0.14	0.23
20	2	68	1	4	4	3	2	2	2	4	4	4	4	4	4	4	4	4	4	4	4	4	4	4	1	1	1	4	4	4	1	1	1	0.3	0.9	0	0.2	0.88	0.84	0.58
21	2	67	2	1	1	1	1	1	1	1	1	1	1	1	1	1	1	1	1	1	1	1	1	1	1	1	1	1	1	1	1	1	1	0.7	0.7	0.1	0.3	-4.17	-3.84	-3.44
22	1	70	1	1	1	1	1	1	1	1	1	1	1	1	1	1	1	1	1	1	1	1	1	1	1	1	1	1	1	1	1	1	1					-4.17	-3.84	-3.44
23	2	68	1	4	4	4	1	1	1	1	1	1	3	3	3	2	3	2	4	4	4	1	1	1	2	3	3	4	4	4	2	2	2	0.3	0.3	0.5	0.1	-0.15	0.02	-0.07
24	1	63	1	1	1	1	3	3	3	1	1	1	4	4	4	2	2	2	1	1	1	1	1	1	1	1	1	1	1	1	1	1	1	0.4	0.4	0	0.2	-1.2	-1.21	-0.99
25	2	73	1	2	2	2	1	1	1	1	1	1	4	4	4	2	3	3	1	1	1	1	1	1	2	3	3	1	1	1	4	4	3	0.5	0.5	0.4	0.2	-0.75	-0.56	-0.54
27	2	70	1	1	1	1	1	1	1	1	1	1	2	3	3	4	4	4	3	3	3	2	2	2	1	1	1	2	3	3	2	2	2	0	0.5	0	0	-0.75	-0.56	-0.44
28	1	65	1	2	2	2	1	1	1	1	1	1	4	3	3	3	3	3	1	1	1	1	1	1	1	1	1	2	2	2	3	3	3	0.4	0.5	0	0	-0.75	-0.92	-0.75
29	1	58	1	1	1	1	1	1	1	1	1	1	4	4	4	1	1	1	1	1	1	1	1	1	1	1	1	1	1	1	3	3	3	0.3	0.5	0.2	0.1	-1.39	-1.38	-1.14
30	1	79	1	4	4	4	4	4	4	4	4	4	3	3	3	3	3	3	1	1	1	1	1	1	1	1	1	2	2	2	3	3	3	0.7	0.7	0.2	0.2	0.08	0.02	0.03
31	2	68	2	1	1	1	4	4	4	4	4	4	2	3	3	4	4	4	1	1	1	4	4	4	1	1	1	1	1	1	1	1	1	1	1	0	0.1	-0.27	-0.22	-0.16
32	2	62	1	1	1	1	1	1	1	1	1	1	1	1	1	1	1	1	1	1	1	1	1	1	1	1	1	4	4	4	1	1	1	0.5	0.2	0.1	0.2	-1.9	-1.82	-1.52
33	2	57	1	2	3	3	2	1	2	2	2	2	4	4	4	4	4	4	1	1	1	2	3	3	4	4	4	4	4	4	2	1	2	0.2	0.4	0	0	0.2	0.14	0.34
34	2	58	1	3	3	4	2	2	4	2	3	4	3	4	4	3	2	4	2	2	2	1	1	1	4	3	4	3	3	4	2	2	4	1	1	0	0.1	-0.04	-0.1	1.19
35	2	60	1	1	1	1	4	2	4	3	3	4	3	3	3	2	2	2	1	1	1	1	1	1	2	2	2	1	1	1	1	1	1	0.7	1	0.1	0.2	-0.75	-1.06	-0.54
36	1	51	1	1	1	1	1	1	1	1	1	1	1	1	1	3	2	3	1	1	1	1	1	1	1	1	1	1	1	1	1	1	1				0	-2.29	-2.75	-1.83
37	2	82	1	1	1	1	1	1	1	1	1	1	2	2	2	1	1	1	1	1	1	3	2	3	2	2	3	2	2	2	1	1	1	0.5	0.4	0.1	0.1	-1.39	-1.57	-0.99
38	2	75	1	1	1	1	2	2	2	1	1	1	1	1	1	1	1	1	1	1	1	1	1	1	1	1	1	1	1	1	2	2	2					-2.29	-2.16	-1.83
39	1	65	1	1	1	1	2	2	2	1	1	1	1	1	1	1	1	1	1	1	1	1	1	1	1	1	1	2	2	3	2	2	3			0.1	0.1	-1.9	-1.82	-1.14
40	2	64	1	1	1	1	4	3	4	1	1	1	3	3	4	4	3	4	1	1	1	1	1	1	3	2	3	3	3	3	1	1	1	0.55	1	0.1	0	-0.38	-0.8	-0.25
41	1	67	1	3	3	4	1	1	1	1	1	1	1	1	1	1	1	1	1	1	1	2	2	2	3	3	3	1	1	1	3	2	2					-1.03	-1.21	-0.86
42	1	74	1	1	1	1	2	2	2	1	1	1	2	2	2	1	1	1	1	1	1	1	1	1	1	1	1	1	1	1	1	1	1	1.3	1	0.4	0	-2.29	-2.16	-1.83
43	2	51	1	1	1	1	1	1	1	1	1	1	1	1	1	4	2	4	1	1	1	1	1	1	3	2	4	2	2	3	1	1	1	0.3	0.1	0	0	-1.2	-1.82	-0.75
44	1	55	1	4	2	4	4	4	4	4	3	4	4	2	2	4	4	3	1	1	1	1	1	1	3	2	3	1	1	1	1	1	1					0.2	-0.56	-0.16
45	2	59	1	1	1	1	1	1	1	1	1	1	1	1	1	1	1	1	1	1	1	1	1	1	1	1	1	1	1	1	1	1	1	0.4	0.4	0.2	0.2	-4.17	-3.84	-3.44
46	2	49	1	1	1	1	3	2	1	3	2	3	4	2	4	1	1	1	1	1	1	1	1	1	1	1	1	1	1	1	1	1	1	0.5	0.5	0	0	-1.03	-1.82	-1.14
47	1	56	1	1	1	1	1	1	1	2	3	3	3	2	2	1	1	1	1	1	1	1	1	1	1	1	1	1	1	1	1	1	1	0	1	0	0.1	-1.9	-1.82	-1.52
48	2	59	1	1	1	1	1	1	1	1	1	1	1	1	1	3	3	4	1	1	1	1	1	1	2	2	2	2	2	2	1	1	1					-1.61	-1.57	-1.14
49	1	63	1	1	1	1	1	1	1	1	1	1	1	1	1	1	1	1	1	1	1	1	1	1	1	1	1	1	1	1	1	1	1	0.4	0.4	0	0.1	-4.17	-3.84	-3.44
50	2	66	2	1	1	1	1	1	1	1	1	1	3	3	3	3	3	3	1	1	1	1	1	1	2	2	2	1	1	1	4	4	4	0.1	0.1	0	0.1	-0.89	-0.92	-0.75
51	2	49	2	4	4	4	4	4	4	3	3	3	4	4	4	4	4	4	2	2	2	1	1	1	2	2	3	4	4	4	4	4	4	0.3	0.5	0.6	0.1	0.88	0.84	0.85
52	2	89	1	2	2	2	2	2	2	2	2	2	1	1	1	3	3	3	1	1	1	1	1	1	1	1	1	4	4	4	4	4	4	1	1	0	0	-0.5	-0.56	-0.44
53	2	50	2	3	3	3	1	1	1	1	1	1	1	1	1	1	1	1	1	1	1	1	1	1	2	2	3	1	1	1	3	3	3	0.55	0.55	0	0	-1.39	-1.38	-0.99
54	2	57	2	3	4	4	4	4	4	4	3	3	1	1	1	4	3	4	1	1	1	1	1	1	1	1	1	1	1	1	4	4	4	0.4	0.3	0	0	-0.15	-0.33	-0.16
55	1	62	2	2	3	2	2	2	2	2	2	2	1	1	1	3	3	3	3	3	3	1	1	1	2	3	3	2	2	2	4	4	4	1	1	0	0	-0.38	-0.22	-0.25
56	2	64	1	4	3	3	3	3	3	1	1	1	3	3	3	2	2	2	1	1	1	1	1	1	1	1	1	3	3	3	1	1	1	0.7	0.6	0	0	-0.62	-0.8	-0.64
57	1	61	1	4	4	4	4	4	4	4	4	4	2	3	3	4	4	4	3	3	3	1	1	1	1	1	1	3	3	2	1	1	1	0.2	1.3	0.1	0	0.2	0.26	0.13
58	2	61	1	1	1	1	1	1	1	1	1	1	1	1	1	1	1	1	1	1	1	1	1	1	2	2	2	4	4	4	1	1	1	0.3	0.3	0.3	0	-1.61	-1.57	-1.31
59	2	61	1	2	2	2	1	1	1	1	1	1	2	2	2	2	2	2	1	1	1	1	1	1	2	2	2	4	4	4	4	4	4	0.55	0.4	0	0	-0.62	-0.68	-0.54
60	2	42	2	1	1	1	1	1	1	2	1	1	1	1	1	1	1	1	1	1	1	2	2	3	2	2	3	2	3	3	1	1	1	1.3	0.6	0	0	-1.61	-1.57	-0.99
61	1	71	1	1	1	1	1	1	1	1	1	1	2	1	1	2	2	2	1	1	1	1	1	1	1	1	1	2	1	1	1	1	1					-1.9	-2.75	-2.39
62	2	64	2	1	1	1	1	1	1	1	1	1	2	2	3	1	1	1	1	1	1	1	1	1	1	1	1	1	1	1	1	1	1					-2.97	-2.75	-1.83
63	2	61	1	1	1	1	1	1	1	4	4	4	1	1	1	1	1	1	1	1	1	1	1	1	1	2	2	2	1	1	1	1	1	CD	0.1	0.1	0	-1.61	-1.57	-1.31
64	2	68	2	1	1	1	1	1	1	1	1	1	2	3	3	1	1	1	1	1	1	1	1	1	3	3	4	2	3	3	1	1	1	0.7	0.7	0	0	-1.61	-1.21	-0.86
65	2	59	2	1	1	1	3	4	2	1	1	1	1	1	1	1	1	1	1	1	1	1	1	1	1	1	1	1	1	1	1	1	1	0.6	0.6	0	0	-2.29	-1.82	-2.39
66	2	62	2	2	3	3	3	4	4	2	1	1	1	1	1	1	1	1	1	1	1	1	1	1	1	1	1	2	2	2	1	1	1					-1.39	-1.21	-0.99
67	1	40	2	1	1	1	4	3	3	1	1	1	1	1	1	1	1	1	2	2	3	1	1	1	1	1	1	2	2	2	1	1	1					-1.39	-1.57	-1.14
68	1	55	2	2	1	1	2	2	2	1	1	1	1	1	1	1	1	1	1	1	1	1	1	1	2	2	2	2	1	1	1	1	1	1.3	1.3	0.1	0.1	-1.61	-2.16	-1.83
69	2	62	2	2	1	1	3	2	2	1	1	1	2	2	1	1	1	1	1	1	1	1	1	1	1	1	1	1	1	1	1	1	1	0.5	1	0	0	-1.61	-2.16	-2.39
70	2	63	2	1	1	1	3	3	3	1	1	1	1	1	1	1	1	1	1	1	1	1	1	1	1	1	1	1	1	1	1	1	1	0.2	0.4	0.2	0.1	-2.29	-2.16	-1.83
71	1	80	2	1	1	1	1	1	1	1	1	1	1	1	1	1	1	1	1	1	1	1	1	1	1	1	1	1	1	1	1	1	1			0	0.3	-4.17	-3.84	-3.44
72	1	57	2	2	1	1	2	1	1	1	1	1	1	1	1	1	1	1	1	1	1	1	1	1	1	1	1	1	1	1	1	1	1	0.5	0	0	0	-2.29	-3.84	-3.44
73	2	67	2	1	1	1	2	1	1	1	1	1	1	1	1	1	1	1	1	1	1	1	1	1	1	1	1	1	1	1	1	1	1	0.2	0.1	0.2	0.1	-2.97	-3.84	-3.44
74	1	75	2	1	1	1	3	2	2	1	1	1	1	1	1	1	1	1	1	1	1	1	1	1	1	1	1	1	1	1	1	1	1	0.2	0.3	0.1	0	-2.29	-2.75	-2.39
75	2	54	2	2	2	2	2	3	4	2	1	1	1	1	1	1	1	1	1	1	1	1	1	1	2	2	1	2	2	2	1	1	1					-1.39	-1.38	-1.14
76	1	69	2	2	2	2	2	2	2	1	1	1	1	1	1	1	1	1	1	1	1	1	1	1	1	1	1	1	1	1	1	1	1					-2.29	-2.16	-1.83
77	2	69	2	2	2	2	1	1	1	2	2	2	1	1	1	1	1	1	1	1	1	1	1	1	1	1	1	1	1	1	1	1	1					-2.29	-2.16	-1.83
78	2	74	2	1	1	1	1	1	1	1	1	1	1	1	1	1	1	1	1	1	1	1	1	1	1	1	1	1	1	1	1	1	1	0.6	0.4	0.2	0.1	-4.17	-3.84	-3.44
79	2	59	2	2	3	2	2	2	2	1	1	1	1	1	1	3	3	4	1	1	1	1	1	1	1	1	1	2	2	2	1	1	1					-1.39	-1.21	-0.99
80	1	79	2	1	1	1	1	1	1	1	1	1	1	1	1	1	1	1	1	1	1	1	1	1	2	2	2	1	1	1	1	1	1					-2.97	-2.75	-2.39
81	1	72	2	2	1	1	2	1	1	1	1	1	1	1	1	1	1	1	1	1	1	1	1	1	1	1	1	1	1	1	1	1	1					-2.29	-3.84	-3.44
82	2	49	2	2	2	2	3	4	4	2	3	3	1	1	1	1	1	1	1	1	1	2	2	2	1	1	1	2	3	2	1	1	1					-1.2	-0.8	-0.75
83	2	79	2	1	1	1	1	1	1	1	1	1	1	1	1	1	1	1	1	1	1	1	1	1	1	1	1	1	1	1	1	1	1					-4.17	-3.84	-3.44
84	2	61	2	2	2	2	3	4	3	3	3	3	1	1	1	1	1	1	1	1	1	1	1	1	2	2	2	2	2	2	1	1	1	1	0.7	0	0.1	-1.03	-0.92	-0.86
85	2	67	2	1	1	1	1	1	1	1	1	1	4	4	4	3	3	3	1	1	1	1	1	1	3	4	4	1	1	1	1	1	1	0.3	0.3	0.4	0.2	-1.03	-0.92	-0.75
86	2	61	2	1	1	1	4	3	1	1	1	1	1	1	1	1	1	1	1	1	1	1	1	1	1	1	1	1	1	1	1	1	1					-1.9	-2.16	-3.44
87	1	54	2	1	1	1	2	2	2	2	2	2	1	1	1	1	1	1	2	2	2	1	1	1	2	2	3	1	1	1	1	1	1					-1.61	-1.57	-1.14
88	2	58	2	3	3	4	1	1	1	3	3	3	1	1	1	1	1	1	1	1	1	1	1	1	3	3	3	3	3	4	1	1	1	0.1	0	0.2	0.2	-0.89	-0.92	-0.54
89	2	65	2	1	1	1	1	1	1	1	1	1	1	1	1	1	1	1	1	1	1	1	1	1	1	1	1	1	1	1	1	1	1	0.6	0.6	0	0	-4.17	-3.84	-3.44
90	1	59	2	2	2	2	1	1	1	1	1	1	1	1	1	1	1	1	1	1	1	1	1	1	1	1	1	1	1	1	1	1	1					-2.97	-2.75	-2.39
91	1	54	2	1	1	1	4	4	4	1	1	1	1	1	1	1	1	1	1	1	1	1	1	1	1	1	1	1	1	1	1	1	1					-1.9	-1.82	-1.52
92	1	66	2	1	1	1	1	1	1	1	1	1	1	1	1	1	1	1	1	1	1	1	1	1	2	2	3	3	3	3	1	1	1					-1.9	-1.82	-1.31
93	1	61	2	1	1	1	1	1	1	1	1	1	1	1	1	1	1	1	1	1	1	1	1	1	1	1	1	1	1	1	1	1	1	1.3	0	0.1	0.1	-4.17	-3.84	-3.44
94	2	56	2	2	1	1	2	2	2	1	1	1	1	1	1	1	1	1	1	1	1	1	1	1	1	1	1	1	1	1	1	1	1	0.3	0.3	0	0	-2.29	-2.75	-2.39
95	2	56	2	1	1	1	2	2	2	1	1	1	1	1	1	1	1	1	1	1	1	1	1	1	1	1	1	1	1	1	1	1	1	0.7	0.7	1	0.1	-2.97	-2.75	-2.39
96	1	54	2	2	2	1	2	2	3	1	1	1	1	1	1	1	1	1	1	1	1	1	1	1	1	1	1	1	1	1	1	1	1					-2.29	-2.16	-1.83
97	2	67	2	2	2	2	2	2	2	2	2	2	1	1	1	1	1	1	1	1	1	1	1	1	1	1	1	1	1	1	1	1	1	0.3	0.3	0.4	0.4	-1.9	-1.82	-1.52
98	2	67	2	2	1	1	1	1	1	2	2	1	1	1	1	1	1	1	1	1	1	1	1	1	1	1	1	1	1	1	1	1	1	0.6	0.2	0.5	0.3	-2.29	-2.75	-3.44
99	2	66	2	1	1	1	1	1	1	2	2	2	1	1	1	1	1	1	1	1	1	1	1	1	1	1	1	1	1	1	1	1	1	1	0.1	0	0	-2.97	-2.75	-2.39
100	1	72	2	2	2	2	2	2	2	1	1	1	1	1	1	2	2	2	1	1	1	1	1	1	1	1	1	1	1	1	1	1	1					-1.9	-1.82	-1.52
101	2	61	2	2	2	2	2	2	2	2	1	1	1	1	1	1	1	1	1	1	1	1	1	1	1	1	1	1	1	1	1	1	1	0.3	0.3	0.1	0.1	-1.9	-2.16	-1.83
102	2	73	2	1	1	1	1	1	1	1	1	1	1	1	1	1	1	1	1	1	1	1	1	1	1	1	1	1	1	1	1	1	1	0.5	0.5	0.4	0	-4.17	-3.84	-3.44
103	2	60	2	1	1	1	1	1	1	1	1	1	1	1	1	1	1	1	1	1	1	1	1	1	1	1	1	1	1	1	1	1	1	0.3	0.4	0	0	-4.17	-3.84	-3.44
104	2	62	2	2	2	2	3	3	3	1	1	1	1	1	1	1	1	1	1	1	1	1	1	1	1	1	1	1	1	1	1	1	1	0.4	0.2	0	0	-1.9	-1.82	-1.52
105	2	55	2	1	1	1	1	1	1	1	1	1	1	1	1	1	1	1	1	1	1	1	1	1	1	1	1	1	1	1	1	1	1					-4.17	-3.84	-3.44
106	1	66	2	1	1	1	1	1	1	1	1	1	1	1	1	1	1	1	1	1	1	1	1	1	1	1	1	1	1	1	1	1	1					-4.17	-3.84	-3.44
107	2	59	2	1	1	1	1	1	1	3	2	2	1	1	1	1	1	1	1	1	1	1	1	1	1	1	1	1	1	1	1	1	1					-2.29	-2.75	-2.39
108	2	71	2	2	2	2	2	2	2	2	2	2	1	1	1	2	1	1	1	1	1	1	1	1	3	2	2	2	2	2	1	1	1	0.5	0.5	0.1	0.1	-1.03	-1.38	-1.14
109	1	78	2	2	2	1	1	1	1	2	1	1	1	1	1	1	1	1	1	1	1	1	1	1	1	1	1	1	1	1	1	1	1					-2.29	-2.75	-3.44
110	1	57	2	1	1	1	1	1	1	1	1	1	1	1	1	1	1	1	1	1	1	1	1	1	1	1	1	2	3	2	1	1	1	0.3	0.7	0	0	-2.97	-2.16	-2.39
111	1	50	2	1	1	1	2	3	2	2	1	1	1	1	1	1	1	1	1	1	1	1	1	1	2	3	3	2	2	2	1	1	1	CD	CD	0	0.2	-1.61	-1.38	-1.31
112	2	67	2	2	2	1	1	1	1	2	2	1	1	1	1	1	1	1	1	1	1	1	1	1	2	2	2	2	2	2	1	1	1	0	0	0.1	0.2	-1.61	-1.57	-1.83
113	2	66	2	1	1	1	1	1	1	1	1	1	1	1	1	1	1	1	1	1	1	1	1	1	1	1	1	1	1	1	1	1	1					-4.17	-3.84	-3.44
114	2	68	2	2	2	2	2	2	2	3	3	3	1	1	1	1	1	1	1	1	1	2	1	1	2	2	1	2	2	2	1	1	1	0.9	0.55	0	0	-1.03	-1.21	-1.14
115	1	68	2	1	1	1	1	1	1	1	1	1	1	1	1	1	1	1	1	1	1	1	1	1	1	1	1	1	1	1	1	1	1	0.3	0.1	0.1	0.1	-4.17	-3.84	-3.44
116	2	70	2	1	1	1	1	1	1	1	1	1	1	1	1	1	1	1	1	1	1	1	1	1	1	1	1	2	3	3	1	1	1					-2.97	-2.16	-1.83
117	2	58	2	1	1	1	1	1	1	2	2	2	1	1	1	2	2	2	1	1	1	1	1	1	2	4	2	2	2	2	1	1	1					-1.61	-1.21	-1.31
118	2	83	2	1	1	1	1	1	1	2	2	2	1	1	1	1	1	1	1	1	1	1	1	1	2	2	2	2	2	2	1	1	1					-1.9	-1.82	-1.52
119	1	60	2	1	1	1	1	1	1	1	1	1	1	1	1	1	1	1	1	1	1	1	1	1	1	1	1	1	1	1	1	1	1					-4.17	-3.84	-3.44
120	1	82	2	2	1	1	2	1	1	2	1	1	1	1	1	1	1	1	1	1	1	1	1	1	1	1	1	1	1	1	1	1	1	0.3	0.3	0	0.3	-1.9	-3.84	-3.44
121	2	55	2	1	1	1	1	1	1	1	1	1	1	1	1	1	1	1	1	1	1	1	1	1	1	1	1	1	1	1	1	1	1					-4.17	-3.84	-3.44
122	1	70	2	1	1	1	1	1	1	1	1	1	1	1	1	1	1	1	1	1	1	1	1	1	1	1	1	1	1	1	1	1	1	0.4	1	0	0.1	-4.17	-3.84	-3.44
123	2	74	2	2	2	2	2	2	2	3	4	4	1	1	1	1	1	1	1	1	1	1	1	1	2	2	2	1	1	1	1	1	1	0.6	0.6	0.2	0.1	-1.39	-1.21	-0.99
124	2	58	2	1	1	1	1	1	1	2	2	1	1	1	1	1	1	1	1	1	1	1	1	1	2	2	2	1	1	1	1	1	1	0.2	0	0.2	0.1	-2.29	-2.16	-2.39
125	2	56	2	2	1	1	2	1	1	1	1	1	1	1	1	1	1	1	1	1	1	1	1	1	1	1	1	1	1	1	1	1	1	0.6	0.6	0.2	0.1	-2.29	-3.84	-3.44
126	1	56	2	2	2	2	3	2	2	2	1	1	1	1	1	1	1	1	1	1	1	1	1	1	1	1	1	1	1	1	1	1	1	1	1.3	0	0.2	-1.61	-2.16	-1.83
127	1	60	2	1	1	1	1	1	1	1	1	1	1	1	1	1	1	1	1	1	1	1	1	1	1	1	1	1	1	1	1	1	1	0.6	0.6	0.3	0.1	-4.17	-3.84	-3.44
128	1	84	2	1	1	1	1	1	1	2	2	1	1	1	1	1	1	1	1	1	1	1	1	1	1	1	1	2	2	2	1	1	1					-2.29	-2.16	-2.39
129	2	61	2	2	2	2	1	1	1	1	1	1	1	1	1	1	1	1	1	1	1	1	1	1	2	2	2	1	1	1	1	1	1	0.3	0.5	0.2	0.1	-2.29	-2.16	-1.83
130	2	64	2	1	1	1	1	1	1	1	1	1	1	1	1	1	1	1	1	1	1	1	1	1	1	1	1	1	1	1	1	1	1					-4.17	-3.84	-3.44
131	1	76	2	1	1	1	1	1	1	2	2	1	1	1	1	1	1	1	1	1	1	1	1	1	2	2	2	2	2	2	1	1	1					-1.9	-1.82	-1.83
132	2	90	2	2	2	2	1	1	1	3	2	2	2	2	2	2	2	2	1	1	1	1	1	1	2	2	3	3	3	3	1	1	1					-0.89	-1.06	-0.75
133	1	59	2	1	1	1	2	2	3	2	1	1	1	1	1	1	1	1	1	1	1	1	1	1	1	1	1	1	1	1	1	1	1	0.7	0.7	0.2	0.1	-2.29	-2.75	-1.83
134	2	61	2	1	1	1	1	1	1	1	1	1	1	1	1	1	1	1	1	1	1	1	1	1	1	1	1	1	1	1	1	1	1					-4.17	-3.84	-3.44
135	2	68	2	1	1	1	1	1	1	1	1	1	1	1	1	1	1	1	1	1	1	1	1	1	1	1	1	1	1	1	1	1	1	1	1	0.1	0.1	-4.17	-3.84	-3.44
136	2	62	2	2	2	1	2	2	2	2	2	1	1	1	1	1	1	1	1	1	1	1	1	1	3	3	1	2	2	2	1	1	1	0.3	0.1	0	0	-1.2	-1.21	-1.83
137	2	57	2	2	3	4	2	3	3	2	3	3	1	1	1	1	1	1	1	1	1	1	1	1	2	3	3	2	3	3	1	1	1					-1.39	-0.68	-0.44
138	2	68	2	1	1	1	2	3	2	2	3	2	1	1	1	1	1	1	1	1	1	1	1	1	1	1	1	1	1	1	1	1	1	CD	0.9	0	0.4	-2.29	-1.57	-1.83
143	1	71	2	1	1	1	2	3	1	2	3	1	2	2	1	1	1	1	1	1	1	1	1	1	2	3	1	1	1	1	1	1	1			0.6	0.2	-1.61	-1.06	-3.44
144	2	65	2	1	1	1	2	3	2	2	2	2	1	1	1	1	1	1	2	3	3	1	1	1	2	3	3	1	1	1	1	1	1	CD	CD	0.5	0.2	-1.61	-1.06	-0.99
145	2	59	2	1	1	1	3	4	4	3	3	4	1	1	1	1	1	1	1	1	1	1	1	1	2	3	2	4	4	4	1	1	1	0.3	0.3	0.5	0.2	-0.89	-0.68	-0.54
146	1	66	1	1	1	1	3	4	3	3	4	3	4	4	4	4	4	4	2	3	4	1	1	1	4	4	4	4	4	4	4	4	4	0.7	CD			0.58	1.01	0.71
147	1	51	1	4	3	4	3	2	2	1	1	1	1	1	1	1	1	1	2	2	2	1	1	1	1	1	1	4	3	2	1	1	1	0.7	0.1			-0.75	-1.21	-0.99
148	1	72	1	2	1	1	2	1	1	1	1	1	4	3	3	1	1	1	1	1	1	2	3	4	1	1	1	2	2	2	4	3	4	0.5	0.5			-0.62	-1.06	-0.64
149	2	81	1	4	3	3	2	2	1	2	2	2	4	4	4	1	1	1	1	1	1	2	2	2	1	1	1	4	4	4	3	3	4	1.3	0.7			-0.15	-0.33	-0.25
150	2	65	1	3	3	4	2	2	2	3	3	3	4	4	4	2	2	2	1	1	1	1	1	1	3	3	4	4	4	4	4	4	4	0.6	0.6			0.2	0.14	0.34
151	1	63	1	4	4	3	1	1	1	2	2	2	4	4	4	4	4	4	1	1	1	2	3	3	3	3	3	4	4	4	4	4	4	1.3	CD			0.45	0.53	0.34
152	1	41	1	4	4	4	4	3	3	2	2	2	4	4	4	2	3	3	2	2	2	2	2	2	1	1	1	4	4	4	4	4	4	0.4	0.4			0.45	0.39	0.34
153	2	74	1	2	4	4	4	3	4	2	2	4	4	3	4	4	2	4	3	3	2	3	3	4	4	4	4	4	3	4	4	4	4	0.3	CD			1.23	0.68	1.98
154	2	67	1	4	3	4	2	2	1	1	1	1	4	4	4	4	4	4	1	1	1	4	4	4	4	2	3	4	4	4	3	3	4	1.3	1			0.73	0.26	0.45
155	1	65	1	1	1	1	1	1	1	1	1	1	3	2	3	3	3	3	1	1	1	1	1	1	1	1	1	2	2	2	2	2	2	0.7	0.4			-1.2	-1.38	-0.99
156	1	76	1	3	3	2	1	1	1	1	1	1	2	2	2	2	2	2	1	1	1	1	1	1	1	1	1	1	1	1	1	1	1	1	1.2			-1.61	-1.57	-1.52
157	2	20	1	2	3	4	2	3	4	2	3	4	4	3	4	3	3	4	2	2	3	1	1	1	2	3	4	4	4	4	4	4	4	0.4	0.4			0.08	0.39	1.39
158	2	83	1	4	3	4	2	2	3	3	3	4	4	4	4	4	4	4	4	3	4	3	3	4	3	3	4	4	4	4	3	4	4	0.7	MM			1.23	1.01	2.58
159	2	66	1	1	1	1	1	1	1	1	1	1	4	4	4	2	2	2	1	1	1	1	1	1	2	2	2	3	3	2	2	2	2	0.7	1			-0.89	-0.92	-0.86
160	1	75	1	2	3	2	2	3	4	2	3	3	3	2	2	3	3	3	2	3	3	4	3	4	4	3	4	2	2	2	2	3	3	0.5	0.3			0.08	0.26	0.45
161	1	71	1	2	2	2	2	2	2	2	2	2	4	4	4	3	3	3	1	1	1	1	1	1	3	3	4	4	4	4	4	4	4	1	1			0.08	0.02	0.13
162	1	55	1	2	3	33	2	3	3	1	1	1	4	4	4	4	4	4	1	1	1	1	1	1	3	4	4	3	3	3	4	4	4	CD	PL			-0.04	0.26	0.24
163	1	76	1	2	3	3	3	3	4	1	1	1	3	3	3	1	1	1	2	2	2	1	1	1	3	3	2	3	3	4	3	3	3	MM	0.3			-0.38	-0.33	-0.16
164	1	22	1	3	4	4	4	3	2	2	3	3	2	3	3	4	4	4	4	3	4	4	4	4	3	3	4	3	3	4	1	1	1	0.7	0.6			0.58	0.68	0.85
165	1	78	1	2	2	3	2	3	3	1	1	1	3	3	4	2	2	2	1	1	1	1	1	1	3	2	3	2	2	2	2	2	2		CD			-0.75	-0.8	-0.35
166	2	72	1	3	3	3	2	2	2	1	1	1	3	3	4	3	3	3	2	2	2	1	1	1	2	2	3	2	2	3	2	2	2		0.7			-0.5	-0.56	-0.16
167	1	80	1	3	3	3	3	3	3	3	3	3	4	4	4	3	2	2	2	2	2	2	2	3	3	2	3	3	3	3	3	3	3	0.7				0.45	0.14	0.34
168	2	74	1	1	1	1	2	2	2	1	1	1	4	3	4	4	3	4	1	1	1	1	1	1	3	3	3	2	3	4	4	4	4	0.2	0.7			-0.27	-0.44	-0.07
169	2	69	1	2	2	2	2	2	4	2	2	2	4	4	4	3	3	3	2	2	2	3	3	3	3	3	4	4	3	3	3	3	4	0.7	0.6			0.32	0.14	0.58
170	2	63	1	2	3	3	1	1	1	2	2	2	4	4	4	4	3	4	3	3	3	1	1	1	4	4	4	4	4	4	4	4	4	CD	PL			0.45	0.39	0.45
171	1	79	1	1	1	1	1	1	1	2	2	2	4	4	4	2	2	2	1	1	1	1	1	1	3	3	3	4	4	4	4	4	4	MM	1			-0.27	-0.33	-0.25
172	2	74	1	2	2	2	1	1	1	2	2	2	4	4	4	2	3	4	1	1	1	1	1	1	2	3	4	4	4	4	3	3	3	0.5	1			-0.38	-0.22	0.03
173	1	70	1	3	3	3	1	1	1	1	1	1	4	4	4	3	3	3	1	1	1	1	1	1	3	3	4	4	4	3	4	4	4	1	1.2			-0.04	-0.1	-0.07
174	2	80	1	3	3	2	2	3	3	2	2	2	2	3	2	2	2	2	1	1	1	1	1	1	2	3	2	2	3	2	3	3	3	1	0.6			-0.62	-0.22	-0.54
175	2	70	1	4	4	4	1	1	1	2	2	2	4	4	4	4	4	4	1	1	1	1	1	1	3	3	3	2	3	3	2	3	3	0.7	0.5			-0.15	0.02	0.03
176	1	51	1	2	3	2	2	1	2	1	2	2	2	3	4	3	3	3	1	1	1	1	1	1	3	3	4	3	3	4	3	3	4	MM	MM			-0.5	-0.33	0.13
177	2	78	1	3	3	4	2	2	2	2	2	2	3	3	4	2	2	3	2	2	3	1	1	1	3	4	4	4	4	4	2	3	4	0.2	MM			-0.15	0.02	0.58
178	2	67	1	3	4	2	2	2	3	2	2	3	3	3	4	3	3	4	1	1	1	1	1	1	3	3	4	3	3	4	4	4	4	1	0.4			-0.04	0.02	0.45
179	1	75	1	1	1	1	2	1	1	2	1	1	4	4	4	3	3	4	1	1	1	1	1	1	3	3	4	3	3	4	3	4	4	1	0.5			-0.27	-0.44	-0.07
180	2	66	1	3	3	4	2	2	2	2	2	3	3	3	4	3	4	4	1	1	1	1	1	1	2	2	2	3	3	4	3	3	4	1.3	1.3			-0.27	-0.22	0.34
181	1	52	1	4	4	4	1	1	1	2	2	3	2	3	3	2	2	3	2	2	2	1	1	1	2	3	4	3	3	4	3	3	4	CD	0.5			-0.38	-0.22	0.34
182	1	73	1	3	3	4	3	4	4	2	2	2	4	4	4	2	2	3	1	1	1	2	2	2	3	4	4	3	4	4	3	3	4	CD	1.3			0.08	0.39	0.71
183	2	64	1	2	2	3	3	3	3	3	3	3	4	4	4	2	2	2	2	2	2	2	2	3	3	3	4	3	3	4	3	3	4	0.6	0.6			0.2	0.14	0.71
184	2	76	1	3	3	4	3	3	3	2	2	3	2	2	2	3	3	3	1	1	1	1	1	1	1	1	1	3	3	4	2	2	2	0.7	0.7			-0.5	-0.56	-0.16
185	2	70	1	2	3	3	2	2	2	3	3	4	3	3	4	2	2	2	2	2	3	1	2	2	3	3	3	2	3	3	2	2	2	1.3	1			-0.38	-0.1	0.23
186	2	67	1	3	4	4	2	3	3	2	2	2	3	3	3	2	2	2	1	1	1	1	1	1	3	3	3	3	4	4	3	3	4	1.3	1.3			-0.27	0.02	0.13
187	2	82	1	4	4	4	3	3	4	2	2	2	4	4	4	2	3	3	2	2	2	1	1	1	3	4	4	3	3	3	3	3	4	CD	0.3			0.2	0.39	0.58
188	1	81	1	3	3	4	3	3	3	3	4	4	4	4	4	2	2	2	2	2	2	2	2	2	2	3	4	3	3	4	3	3	4	1.3	0.3			0.2	0.39	0.85
189	2	67	1	2	3	3	2	2	2	2	2	2	3	3	3	2	2	2	1	1	1	1	1	1	2	2	2	2	2	2	2	2	3	0.7	1			-0.75	-0.68	-0.44
190	2	58	1	3	3	3	2	2	2	2	2	4	4	4	4	2	3	3	1	2	1	1	1	1	2	2	2	4	4	4	3	3	3	1	1			-0.15	0.02	0.13
191	2	65	1	1	1	1	2	3	3	2	3	4	4	4	4	4	4	4	1	1	1	2	3	4	3	3	4	4	4	3	4	4	4	0.3	1			0.2	0.53	0.71
192	2	62	1	3	3	4	3	3	4	3	4	3	2	2	2	2	3	2	2	2	2	2	2	2	2	3	3	1	1	1	3	3	3	1.3	0.6			-0.27	0.02	0.03
193	2	71	1	1	1	1	2	3	2	2	2	2	3	3	3	2	2	2	1	1	1	1	1	1	4	4	4	2	3	3	2	2	3	1.3	0.7			-0.62	-0.44	-0.35
194	1	67	1	1	1	1	2	2	2	1	1	1	3	3	3	2	2	2	1	1	1	1	1	1	3	3	3	2	2	2	2	2	2	1.3	0			-0.89	-0.92	-0.75
195	1	75	1	3	3	4	1	1	1	3	4	4	4	4	4	4	4	4	2	3	3	1	1	1	3	3	4	3	3	3	3	3	4	PL	PL			0.2	0.39	0.71
196	2	49	1	1	1	1	1	1	1	4	4	4	4	4	4	4	4	4	1	1	1	1	1	1	3	3	4	3	4	4	3	3	3	SPL	CD			-0.04	0.02	0.13
197	1	64	1	4	4	4	1	1	1	1	1	1	4	4	4	4	4	4	4	4	4	1	1	1	1	1	1	4	4	4	4	4	4	MM	CD			0.32	0.26	0.23
198	2	78	1	3	3	3	3	3	3	1	1	1	4	4	4	4	4	4	1	1	1	1	1	1	1	1	1	3	3	4	3	3	4	0.5	0.5			-0.15	-0.22	0.03
199	1	72	1	3	3	3	1	1	1	1	1	1	4	4	4	4	4	4	1	1	1	1	1	1	1	1	1	4	3	4	2	3	3	0.7	0.7			-0.38	-0.44	-0.25
200	1	82	1	1	1	1	1	1	1	1	1	1	4	4	4	1	1	1	1	1	1	1	1	1	1	1	1	2	3	2	1	1	1	1.3	0.3			-1.61	-1.38	-1.31
201	2	57	1	2	3	3	2	3	3	1	1	1	4	4	4	3	3	3	1	1	1	1	1	1	2	3	3	2	3	3	1	1	1	CD	CD			-0.75	-0.33	-0.25
202	2	77	1	2	3	3	4	4	4	2	3	3	4	4	4	4	4	4	1	1	1	1	1	1	1	1	1	1	1	1	1	1	1	CD	0.7			-0.5	-0.33	-0.25
203	1	72	1	2	3	3	2	3	3	2	3	3	4	4	4	4	4	4	1	1	1	1	1	1	2	3	3	1	1	1	1	1	1	0.4	CD			-0.62	-0.22	-0.16
204	1	54	1	1	1	1	1	1	1	1	1	1	4	3	3	4	3	3	1	1	1	1	1	1	1	1	1	1	1	1	2	3	3	0.7	MM			-1.03	-1.21	-0.99
205	1	74	1	2	2	3	3	3	3	4	4	4	3	3	3	3	3	3	4	4	4	1	1	1	2	2	2	4	4	4	2	2	2	0.6	0.3			0.32	0.26	0.34
206	2	59	1	1	1	1	1	1	1	1	1	1	4	4	4	4	4	4	1	1	1	2	2	2	1	1	1	4	4	4	4	4	4	1.3	1			-0.27	-0.33	-0.25
207	2	81	1	1	1	1	3	3	3	3	3	4	4	4	4	4	4	4	1	1	1	1	1	1	4	4	4	4	4	4	1	1	1	CD	1			0.08	0.02	0.13
208	1	72	1	3	3	3	3	3	3	3	3	3	4	4	4	4	4	4	3	3	3	2	2	2	4	4	4	4	4	4	4	4	4	0.2	MM			1.23	1.2	1.01
209	1	59	1	4	4	4	1	1	1	4	4	4	4	4	4	4	4	4	1	1	1	1	1	1	1	1	1	4	4	4	1	1	1	1.3	1			-0.04	-0.1	-0.07
210	1	67	1	1	1	1	2	2	2	1	1	1	4	4	4	4	4	4	1	1	1	1	1	1	4	4	4	2	2	2	2	2	2	0.4	0.4			-0.38	-0.44	-0.35
211	2	55	1	4	4	4	4	4	4	3	3	4	4	4	4	4	4	4	1	1	1	1	1	1	3	3	3	2	2	2	1	1	1	0.7	0.4			0.2	0.14	0.23
212	2	74	1	1	1	1	1	1	1	1	1	1	4	4	4	4	4	4	1	1	1	1	1	1	1	1	1	2	3	3	1	1	1	1	0.7			-1.03	-0.92	-0.75
213	1	45	1	4	4	4	2	3	3	1	1	1	1	1	1	4	4	4	2	3	3	1	1	1	1	1	1	4	4	4	2	3	3	MM	1			-0.38	-0.1	-0.07
214	2	78	1	1	1	1	2	3	3	1	1	1	4	4	4	1	1	1	1	1	1	1	1	1	3	3	4	1	1	1	1	1	1	0.6	0.6			-1.2	-1.06	-0.75
215	1	64	1	4	4	4	1	1	1	1	1	1	4	4	4	4	4	4	1	1	1	1	1	1	1	1	1	4	4	4	4	4	4	0.4	0.4			-0.04	-0.1	-0.07
216	2	70	1	1	1	1	1	1	1	1	1	1	4	3	3	3	3	3	1	1	1	1	1	1	3	3	3	2	3	3	2	2	2	1	1			-0.75	-0.8	-0.64
217	1	65	1	1	1	1	1	1	1	1	1	1	4	4	4	4	4	4	1	1	1	1	1	1	4	3	3	2	3	3	2	3	3	0.4	0.4			-0.5	-0.44	-0.35
218	2	68	1	1	1	1	1	1	1	2	3	3	2	3	3	2	3	3	1	1	1	1	1	1	3	3	3	2	3	3	1	1	1	1.3	0.7			-1.2	-0.68	-0.54
219	2	59	1	3	3	3	1	1	1	4	4	4	4	4	4	4	4	4	1	1	1	1	1	1	1	1	1	2	3	3	1	1	1	0.4	CD			-0.38	-0.33	-0.25
220	1	71	1	1	1	1	1	1	1	1	1	1	3	4	4	3	4	4	2	2	2	1	1	1	1	1	1	2	3	3	1	1	1	1	0.1			-1.2	-0.8	-0.64
221	1	69	1	1	1	1	1	1	1	1	1	1	4	4	4	4	4	4	1	1	1	1	1	1	1	1	1	2	3	3	1	1	1	1	1			-1.03	-0.92	-0.75
222	2	75	1	1	1	1	1	1	1	1	1	1	4	4	4	4	4	4	1	1	1	1	1	1	1	1	1	1	1	1	2	3	3	0.5	0.5			-1.03	-0.92	-0.75
223	2	73	1	1	1	1	1	1	1	1	1	1	4	4	4	4	4	4	1	1	1	1	1	1	1	1	1	3	4	4	2	3	3	SPL	0			-0.75	-0.56	-0.44
224	2	63	1	4	4	4	3	4	4	3	4	4	4	4	4	4	4	4	1	1	1	1	1	1	1	1	1	2	3	4	2	3	3	CD	1.2			-0.04	0.39	0.45
225	1	66	1	1	1	1	1	1	1	1	1	1	2	2	2	2	2	2	1	1	1	1	1	1	1	1	1	1	1	1	1	1	1	0.5	1			-2.29	-2.16	-1.83
226	2	68	1	2	2	2	3	3	4	2	2	2	3	3	4	2	2	3	1	1	1	1	1	1	1	3	3	3	3	4	3	3	4	0.6	0.6			-0.5	-0.33	0.23
227	2	90	1	4	4	4	2	2	2	3	3	4	4	3	3	3	4	4	2	2	3	1	1	1	4	4	4	4	4	3	3	3	4	1	1			0.58	0.53	0.71
228	1	57	1	2	2	2	3	3	3	2	1	2	3	3	4	2	2	2	2	3	3	1	1	1	2	2	3	3	3	4	3	3	4	CD	0.6			-0.27	-0.33	0.23
229	2	66	1	4	3	3	2	4	3	2	2	3	4	4	4	3	3	4	2	2	2	2	2	3	3	3	3	3	3	4	3	3	4	CD	1.3			0.32	0.39	0.85
230	1	84	1	3	3	4	3	3	4	2	2	2	3	3	4	3	4	3	2	3	2	2	2	2	3	4	3	4	4	4	3	3	3	0.6	0.7			0.32	0.68	0.58
231	1	74	1	2	3	3	4	4	4	2	2	3	4	4	4	3	3	3	1	1	1	1	1	1	3	3	3	3	3	3	3	3	3	0.7	1.2			0.08	0.14	0.23
232	2	59	1	4	4	4	2	2	2	2	2	2	3	3	4	3	3	4	1	1	1	1	1	1	2	3	3	2	3	3	2	2	3	1.3	1.3			-0.38	-0.22	0.13
233	2	52	1	2	2	2	3	3	3	2	2	2	3	3	3	2	2	2	2	2	2	1	1	1	2	2	2	2	2	2	2	2	2	CD	1.3			-0.5	-0.56	-0.44
234	2	64	1	3	3	3	2	2	1	1	1	1	2	2	2	3	3	4	1	1	1	1	1	1	2	2	2	2	2	2	3	3	3	0.5	0.5			-0.62	-0.68	-0.54
235	2	74	1	3	3	3	2	2	2	2	2	2	3	3	4	2	2	2	3	3	4	2	2	2	3	4	4	3	3	4	3	3	4	0.6	0.6			0.08	0.14	0.58
236	2	80	1	4	4	4	3	3	4	2	2	2	4	4	4	4	4	4	2	2	1	1	1	1	3	3	4	3	3	4	3	3	3	0.7	0.5			0.45	0.39	0.58
237	2	65	1	3	3	4	2	2	1	2	2	1	2	3	3	3	3	4	1	1	1	1	1	1	3	3	4	2	2	3	3	3	4	MM	0.4			-0.38	-0.33	0.03
238	1	74	1	3	3	3	3	3	3	2	2	2	3	3	4	3	3	4	2	2	1	2	2	1	3	4	4	4	4	4	3	3	4	0.6	0.5			0.32	0.39	0.45
239	2	72	1	3	3	4	3	3	4	3	3	4	3	4	4	2	2	2	2	2	1	2	2	1	3	3	4	3	3	3	3	3	4	0.5	1			0.2	0.26	0.58
240	2	78	1	4	4	4	3	3	3	3	3	3	4	4	4	2	3	3	2	2	2	3	3	4	4	4	4	4	4	4	3	3	4	0.4	0.6			0.88	1.01	1.19
241	1	72	1	3	3	4	2	3	3	2	2	3	4	4	4	2	3	3	1	1	1	1	1	1	3	4	4	4	4	4	3	3	4	CD	1			-0.04	0.26	0.58
242	1	77	1	3	3	4	1	1	1	1	1	1	4	4	4	4	4	4	1	1	1	2	2	2	3	3	2	4	4	3	3	3	4	1.3	0.6			0.08	0.02	0.03
243	2	81	1	2	3	3	2	2	2	1	1	1	4	4	4	3	4	4	2	1	2	1	1	1	3	3	3	3	3	3	3	3	3	0.6	0.5			-0.15	-0.1	0.03
244	2	68	1	3	3	4	3	3	4	2	2	2	2	2	2	2	2	2	2	2	1	1	1	1	2	2	2	3	3	3	2	2	2	1.3	0.3			-0.38	-0.44	-0.25
245	2	66	1	3	3	4	2	2	2	2	2	2	4	3	4	3	2	3	1	1	1	1	1	1	3	3	4	3	4	4	3	4	4	0.7	0.5			-0.04	-0.1	0.34

## Sheet: legends
Q01	Com que frequência você tem ofuscamento na sua visão?
Q02	Qual é a intensidade deste ofuscamento?
Q03	O quanto esse ofuscamento te incomoda?
Q04	Com que frequência você apresenta halos na visão?
Q05	Qual a intensidade dos halos?
Q06	O quanto os halos te incomodam?
Q07	Com que frequência você apresenta “explosão de estrelas” na visão?
Q08	Qual a intensidade dessa “explosão de estrelas”?
Q09	O quanto a “explosão de estrelas” te incomoda?
Q10	Com que frequência você apresenta visão enevoada?
Q11	Qual a intensidade dessa visão enevoada?
Q12	O quanto a visão enevoada te incomoda?
Q13	Com que frequência você apresenta visão borrada?
Q14	Qual a intensidade dessa visão borrada?
Q15	O quanto essa visão borrada te incomoda?
Q16	Com que frequência você apresenta visão distorcida?
Q17	Qual a intensidade dessa visão distorcida?
Q18	O quanto essa visão distorcida te incomoda?
Q19	Com que frequência você apresenta visão dupla?
Q20	Qual a intensidade dessa visão dupla?
Q21	O quanto essa visão dupla te incomoda?
Q22	Com que frequência você apresenta flutuação na visão?
Q23	Qual a intensidade da flutuação na visão?
Q24	O quanto a flutuação na visão te incomoda?
Q25	Com que frequência você apresenta dificuldade para focar a visão?
Q26	Qual a intensidade dessa dificuldade para focar a visão?
Q27	O quanto a dificuldade para focar a visão te incomoda?
Q28	Com que frequência você apresenta dificuldade para enxergar profundidade e distância?
Q29	Qual a intensidade dessa dificuldade para enxergar profundidade e distância?
Q30	O quanto essa dificuldade para enxergar profundidade e distância te incomoda?
gender	1 = Male | 2 = Female
Fácico ou Pseudofácico	1 = Fácico | 2 = Pseudofácico
